# Supplementary material for: The effect of glycine administration on the characteristics of physiological systems in human adults: A systematic review
Source: PubMed Central journal article supplement (PMC10828290; doi:10.1007/s11357-023-00970-8), 2023-10-18
Supplement: 11357_2023_970_MOESM1_ESM.pdf [file 11357_2023_970_MOESM1_ESM.pdf]

1 **Supplementary Information A** – Search strategy

2 The following search query was executed in Pubmed, EMBASE, Cochrane (CENTRAL), and  
3 Web of Science:

4 (supplement\* OR treat\* OR administrat\* OR administer\* OR ingest\*)

5 AND

6 (men OR man OR adult OR women OR woman OR older OR elderly OR middle age\* OR  
7 old OR adult\* OR male\* OR female\* OR individual\*)

8 AND

9 glycine
